# Supplementary material for: Crystalline core–amorphous shell heterostructures: epitaxial assembly of NiB nanosheets onto PtPd mesoporous hollow nanopolyhedra for enhanced hydrogen evolution electrocatalysis
Source: Royal Society of Chemistry journal article supplement (doi:10.1039/d0ta02537b), 2020-01-01
Supplement: d0ta02537b1.pdf [file d0ta02537b1.pdf]

### Electronic Supplementary Information

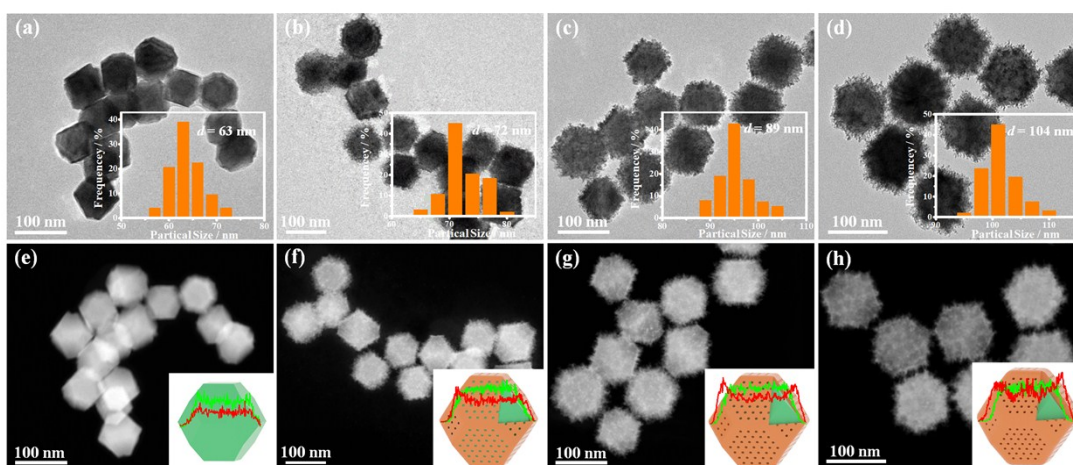

**Fig. S1** TEM images of the formation process of the c-Pd@PdPt MTO at (a) 0.5 h, (b) 1 h, (c) 2 h and (d) 4 h, respectively. Inset in is particle-size distribution histograms. HAADF-STEM and the corresponding elemental distribution images of the reaction intermediates at (e) 0.5 h, (f) 1 h, (g) 2 h and (h) 4 h, respectively.

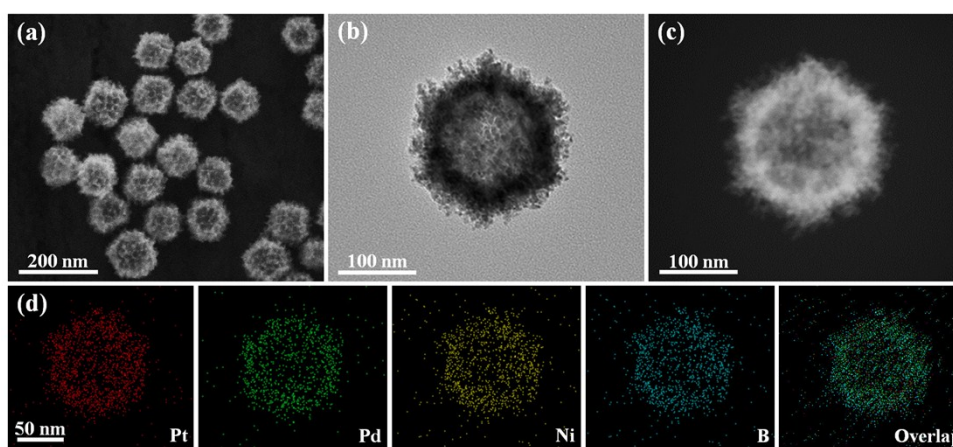

**Fig. S2** (a) SEM, (b) TEM, (c) HRTEM, and (d) elemental mapping images of the PtPd-Ni-B MTONs

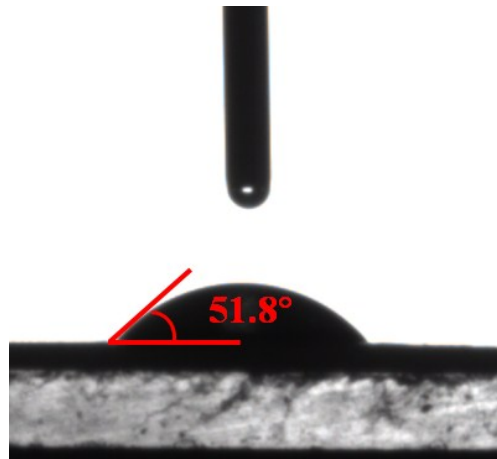

**Fig. S3** Contact angles of the c-PtPd MTONs.

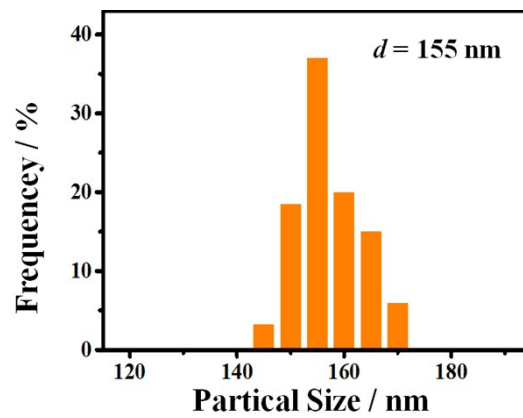

**Fig. S4** Particle-size distribution histogram of the c-PtPd@a-NiB CSHs.

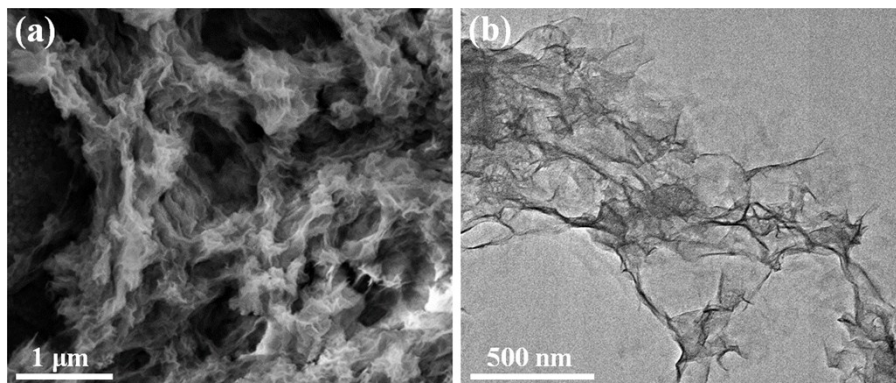

**Fig. S5** (a) SEM and (b) TEM images of the a-NiB nanosheets.

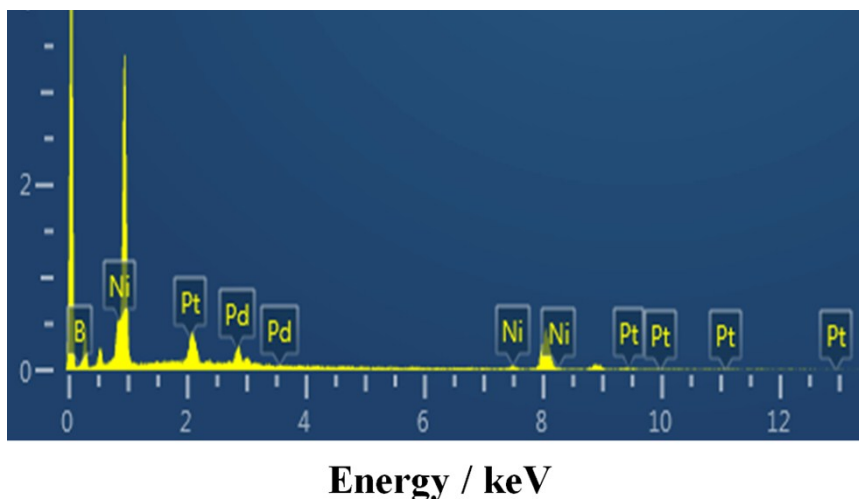

**Fig. S6** EDX spectrum of the c-PtPd@a-NiB CSHs.

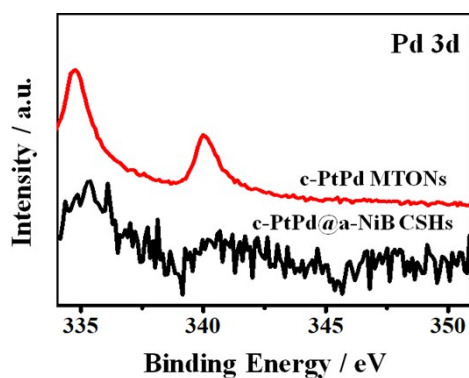

**Fig. S7** XPS spectra of the Pd 3d for the c-PtPd MTONs and c-PtPd@a-NiB CSHs.

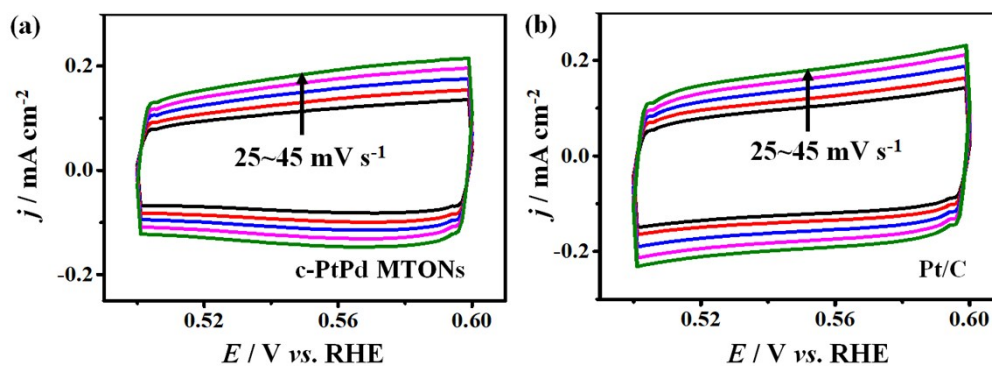

**Fig. S8** (a-b) Typical cyclic voltammogram (CV) curves of the c-PtPd MTONs and Pt/C with different scan rates.

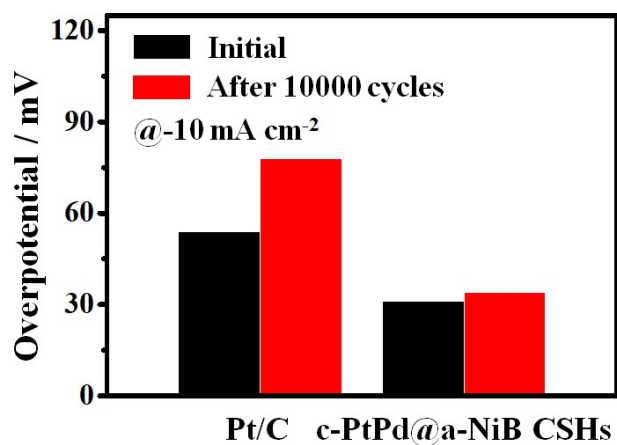

**Fig. S9** Comparison of the required overpotentials at  $-10 \text{ mA cm}^{-2}$  for the Pt/C and c-PtPd@a-NiB CSHs initial and after 10000 cycles stability testing.

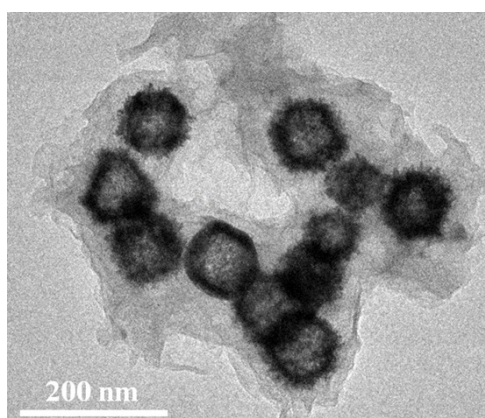

**Fig. S10** TEM image of the c-PtPd@a-NiB CSHs after HER testing in 1 M KOH electrolyte.

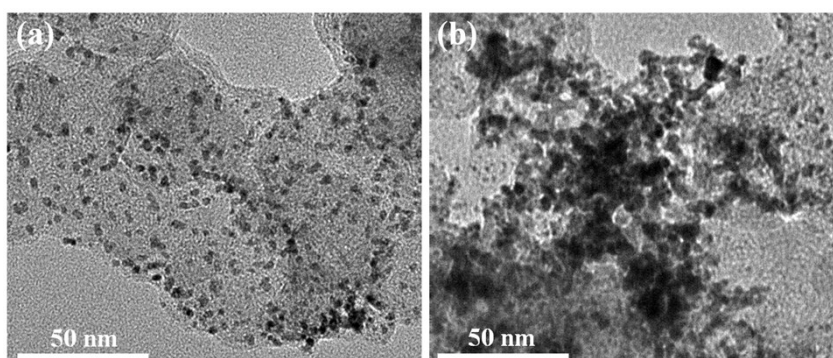

**Fig. S11** TEM images of Pt/C (a) before and (b) after HER testing in 1 M KOH electrolyte.

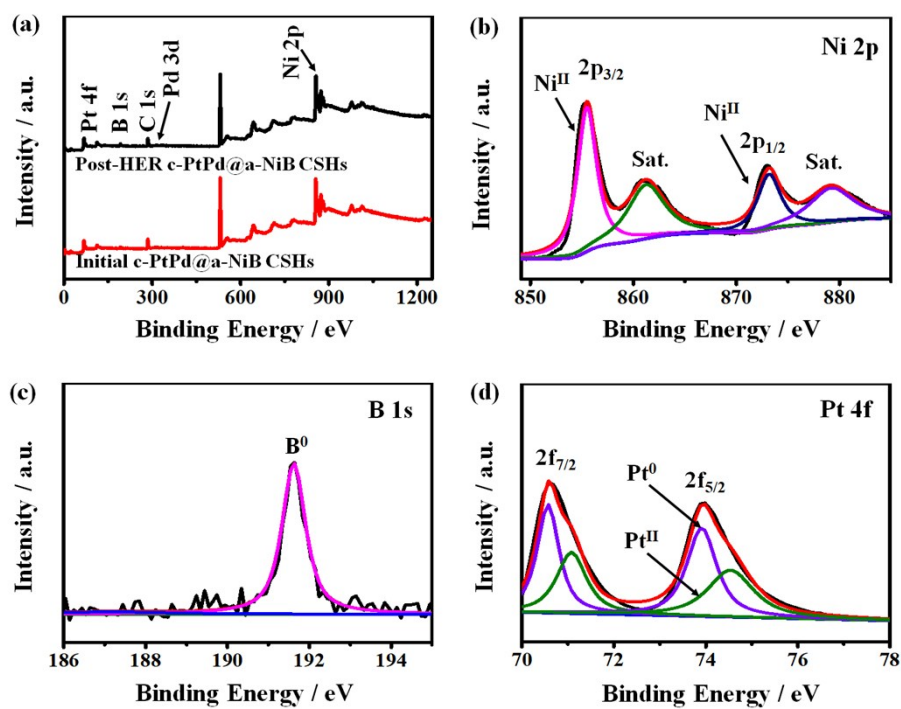

**Fig. S12** (a) The XPS survey spectrum of initial and post-HER c-PtPd@a-NiB CSHs.

(b) Ni 2p, (c) B 1s and (d) Pt 4f XPS spectra for the post-HER c-PtPd@a-NiB CSHs.

**Table S1.** Comparison of HER activities in 1 M KOH for c-PtPd@a-NiB CSHs with other reported Pt-based electrocatalysts.

| Catalyst                      | Overpotential at 10 mA cm <sup>-2</sup> (mV) | Electrolyte    | Ref.             |
|-------------------------------|----------------------------------------------|----------------|------------------|
| <b>c-PtPd@a-NiB CSHs</b>      | <b>31</b>                                    | <b>1 M KOH</b> | <b>This work</b> |
| Pt/h-BN                       | 75                                           | 1 M KOH        | 1                |
| Pt–Ni alloy                   | 65                                           | 1 M KOH        | 2                |
| PtNi-O nanostructure          | 40                                           | 1 M KOH        | 3                |
| Pt–Ni nanocages               | 104                                          | 1 M KOH        | 4                |
| Pt–Ni/NiS nanowires           | 42                                           | 1 M KOH        | 5                |
| Pt–Ni nanowires               | 40                                           | 1 M KOH        | 6                |
| Ni <sub>3</sub> N/Pt          | 50                                           | 1 M KOH        | 7                |
| Pt NWs/SL-Ni(OH) <sub>2</sub> | 70                                           | 1 M KOH        | 8                |
| PtNi nanoparticles            | 82                                           | 1 M KOH        | 9                |
| Pt–Ni alloy nanoparticles     | 72                                           | 1 M KOH        | 10               |
| Pt-Ni-P nanowire              | 44                                           | 1 M KOH        | 11               |
| D-PtNi/C                      | 40                                           | 1 M KOH        | 12               |
| Pt–Co(OH) <sub>2</sub> /CC    | 32                                           | 1 M KOH        | 13               |
| Ni-MOF@Pt                     | 102                                          | 1 M KOH        | 14               |
| PtNiP MNs/C                   | 54                                           | 1 M KOH        | 15               |

## References

1. A. Guha, T. Veettil Vineesh, A. Sekar, S. Narayanaru, M. Sahoo, S. Nayak, S. Chakraborty and T. N. Narayanan, *ACS Catal.*, 2018, **8**, 6636-6644.
2. Z. Cao, Q. Chen, J. Zhang, H. Li, Y. Jiang, S. Shen, G. Fu, B. A. Lu, Z. Xie and L. Zheng, *Nat. Commun.*, 2017, **8**, 15131.
3. Z. Zhao, H. Liu, W. Gao, W. Xue, Z. Liu, J. Huang, X. Pan and Y. Huang, *J. Am. Chem. Soc.*, 2018, **140**, 9046-9050.
4. Z. Cao, H. Li, C. Zhan, J. Zhang, W. Wang, B. Xu, F. Lu, Y. Jiang, Z. Xie and L. Zheng, *Nanoscale*, 2018, **10**, 5072-5077.
5. P. Wang, X. Zhang, J. Zhang, S. Wan, S. Guo, G. Lu, J. Yao and X. Huang, *Nat. Commun.*, 2017, **8**, 14580.
6. P. Wang, K. Jiang, G. Wang, J. Yao and X. Huang, *Angew. Chem., Int. Ed.*, 2016, **55**, 12859-12863.
7. Y. Wang, L. Chen, X. Yu, Y. Wang and G. Zheng, *Adv. Energy Mater.*, 2017, **7**, 1601390.
8. H. Yin, S. Zhao, K. Zhao, A. Muqsit, H. Tang, L. Chang, H. Zhao, Y. Gao and Z. Tang, *Nat. Commun.*, 2015, **6**, 6430.
9. J. Chen, J. Wang, J. Chen and L. Wang, *J. Mater. Sci.*, 2017, **52**, 13064-13077.
10. Z. Du, Y. Wang, J. Li and J. Liu, *J. Nanopart. Res.*, 2019, **21**.
11. P. Wang, Q. Shao, J. Guo, L. Bu and X. Huang, *Chem. Mater.*, 2020, DOI: 10.1021/acs.chemmater.0c00172.
12. H. Chen, G. Wang, T. Gao, Y. Chen, H. Liao, X. Guo, H. Li, R. Liu, M. Dou, S. Nan and Q. He, *J. Phys. Chem. C*, 2020, **124**, 5036-5045.
13. Z. Xing, C. Han, D. Wang, Q. Li and X. Yang, *ACS Catal.*, 2017, **7**, 7131-7135.
14. K. Rui, G. Zhao, M. Lao, P. Cui, X. Zheng, X. Zheng, J. Zhu, W. Huang, S. X. Dou and W. Sun, *Nano Lett*, 2019, **19**, 8447-8453.
15. C. Li, Y. Xu, D. Yang, X. Qian, X. Chai, Z. Wang, X. Li, L. Wang and H. Wang, *ACS Sustainable Chem. Eng.*, 2019, **7**, 9709-9716.
